# Supplementary material for: Evaluation of a porous imine-based covalent organic framework for solid-phase extraction of nitroimidazoles
Source: Royal Society of Chemistry journal article supplement (doi:10.1039/d1ay02171k), 2022-01-01
Supplement: d1ay02171k1.pdf [file d1ay02171k1.pdf]

## Evaluation of a Porous Imine-Based Covalent Organic Framework for Solid-Phase Extraction of Nitroimidazoles

Zhikai Hong<sup>a</sup>, Yingjiao Dong<sup>a</sup>, Ruijie Wang<sup>a</sup> and Guanhua Wang<sup>\*a</sup>

College of Veterinary Medicine, South China Agricultural University, Guangzhou 510642, Guangdong, PR China. E-mail: ghwang@scau.edu.cn; Tel: +86-02085280234

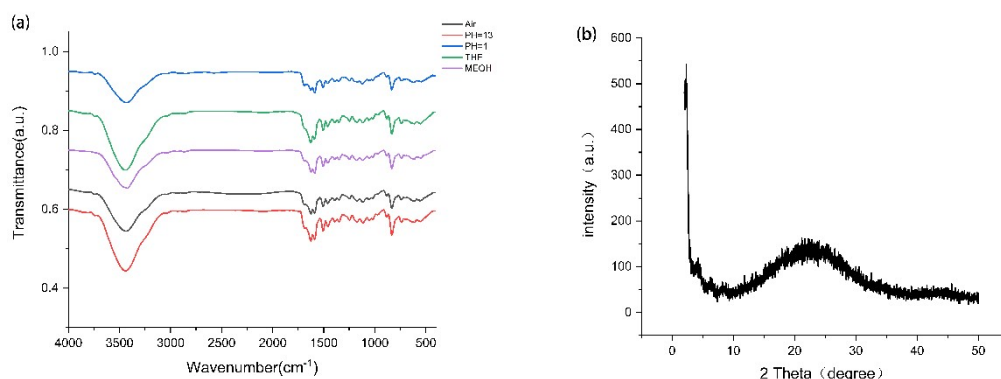

Fig.S1 (a) The FTIR spectrum of BP-COF in different conditions; (b) The PXRD pattern of BP-COF

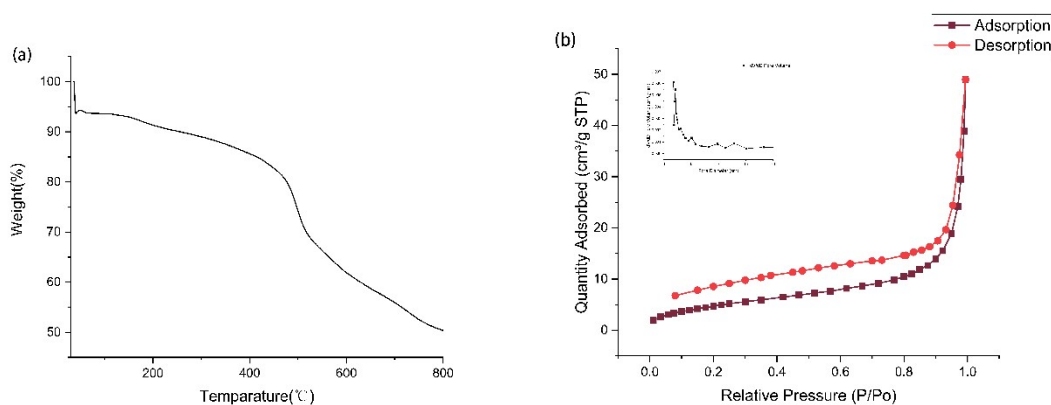

Fig.S2 (a)The TGA analysis of BP-COF; (b) N<sub>2</sub> adsorption-desorption isotherms of BP-COF.

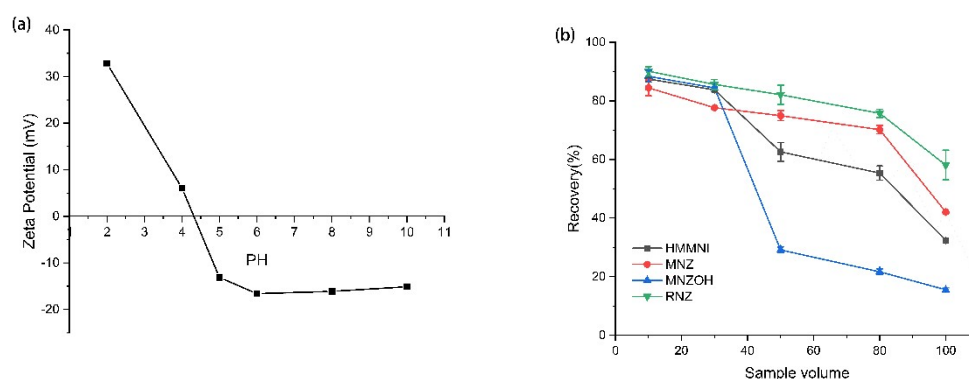

Fig.S3(a) Zeta potential of BP-COF; (b) Effect of the sample volume on the recoveries of NDZs (conditions: amount of sorbent, 60 mg; washing solvent, 1 mL water; elution solvent, 2 mL MeOH with 5% NH<sub>3</sub>; sample pH,4; Spiked level, 10 ng ml<sup>-1</sup>)

Table S1 Monitored LC-MS/MS transitions, sample cone voltages, collision energies and retention time of the four 5-NDZs.

| Analyte<br>s | Parent ion (m/z) | Daughter ion (m/z) | Cone voltage<br>(V) | Collision energy<br>(eV) | RT (min) |
|--------------|------------------|--------------------|---------------------|--------------------------|----------|
| HMM<br>NI    | 158.06           | 140.05*94.05       | 8                   | 10-22                    | 1.43     |
| MNZ          | 172.07           | 128.05*82.05       | 18                  | 12-22                    | 1.5      |
| MNZO<br>H    | 188.07           | 126.03*123.06      | 16                  | 10-14                    | 1.12     |
| RNZ          | 201.06           | 140.05*55.05       | 14                  | 12-20                    | 1.94     |
